# Supplementary material for: Glucose-induced fabrication of Bi/α-FeC2O4·2H2O heterojunctions: a bifunctional catalyst with enhanced photocatalytic and Fenton oxidation efficiency
Source: Royal Society of Chemistry journal article supplement (doi:10.1039/c9cy00439d), 2019-01-01
Supplement: c9cy00439d1.pdf [file c9cy00439d1.pdf]

Electronic Supplementary Material (ESI) for Catal. Sci. Technol.

This journal is © The Royal Society of Chemistry 2018

**Glucose induced fabrication of Bi/ $\alpha$ -FeC<sub>2</sub>O<sub>4</sub>·2H<sub>2</sub>O heterojunction:  
A bifunctional catalyst with enhanced photocatalytic and Fenton  
oxidation efficiency**

Kai Li,<sup>a</sup> Yujun Liang,<sup>\*a</sup> Jian Yang,<sup>a</sup> Gui Yang,<sup>a</sup> Hang Zhang,<sup>a</sup> Kun Wang,<sup>a</sup> Rui Xu,<sup>b</sup> Xianjun Xie,<sup>\*b</sup>

<sup>a</sup>*Faculty of Materials Science and Chemistry, Engineering Research Center of Nano-Geomaterials of  
Ministry of Education, China University of Geosciences, Wuhan, China*

<sup>b</sup>*State Key Laboratory of Biogeology and Environmental Geology & School of Environmental Studies,  
China University of Geosciences, Wuhan 430074, PR China*

*\*Corresponding author, Tel: +86 27 67884814; Fax: +86 27 67883733; E-mail:*

*[yujunliang@sohu.com](mailto:yujunliang@sohu.com) (Yujun Liang); [xjxie@cug.edu.cn](mailto:xjxie@cug.edu.cn) (Xianjun Xie)*

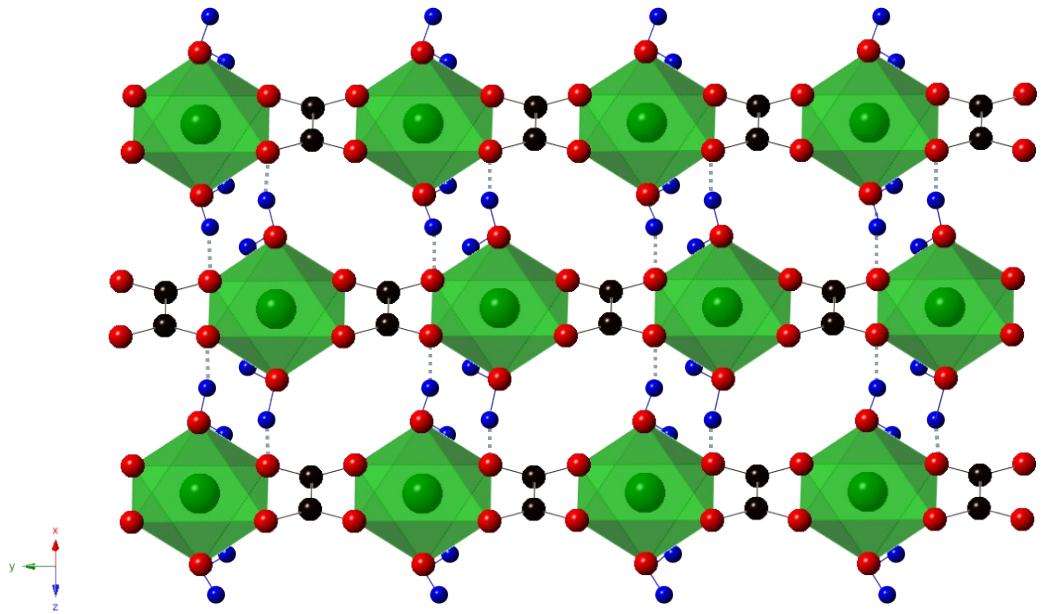

Fig. S1 Crystal structure of  $\alpha$ -FOD.

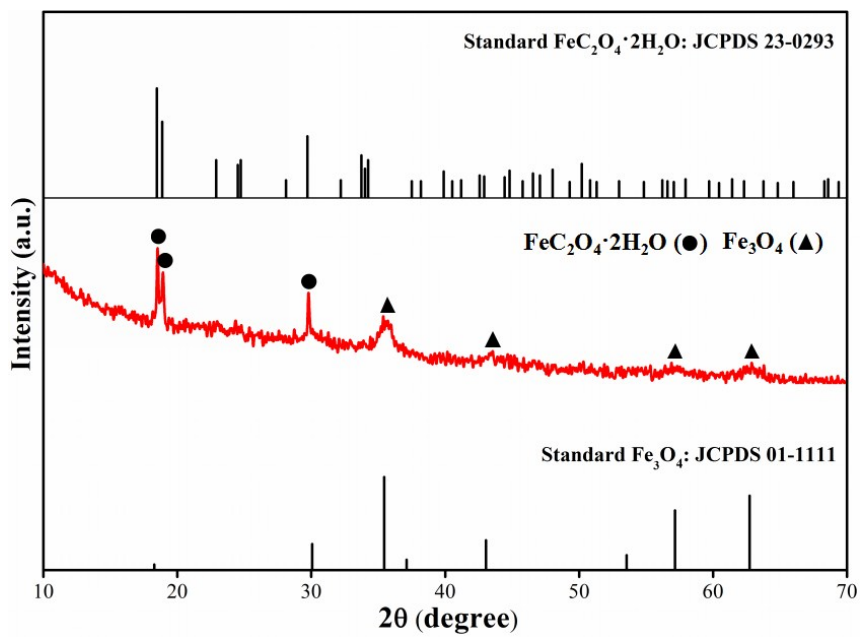

**Fig. S2** XRD pattern of the solvothermal production of Fe(NO<sub>3</sub>)<sub>3</sub>·9H<sub>2</sub>O

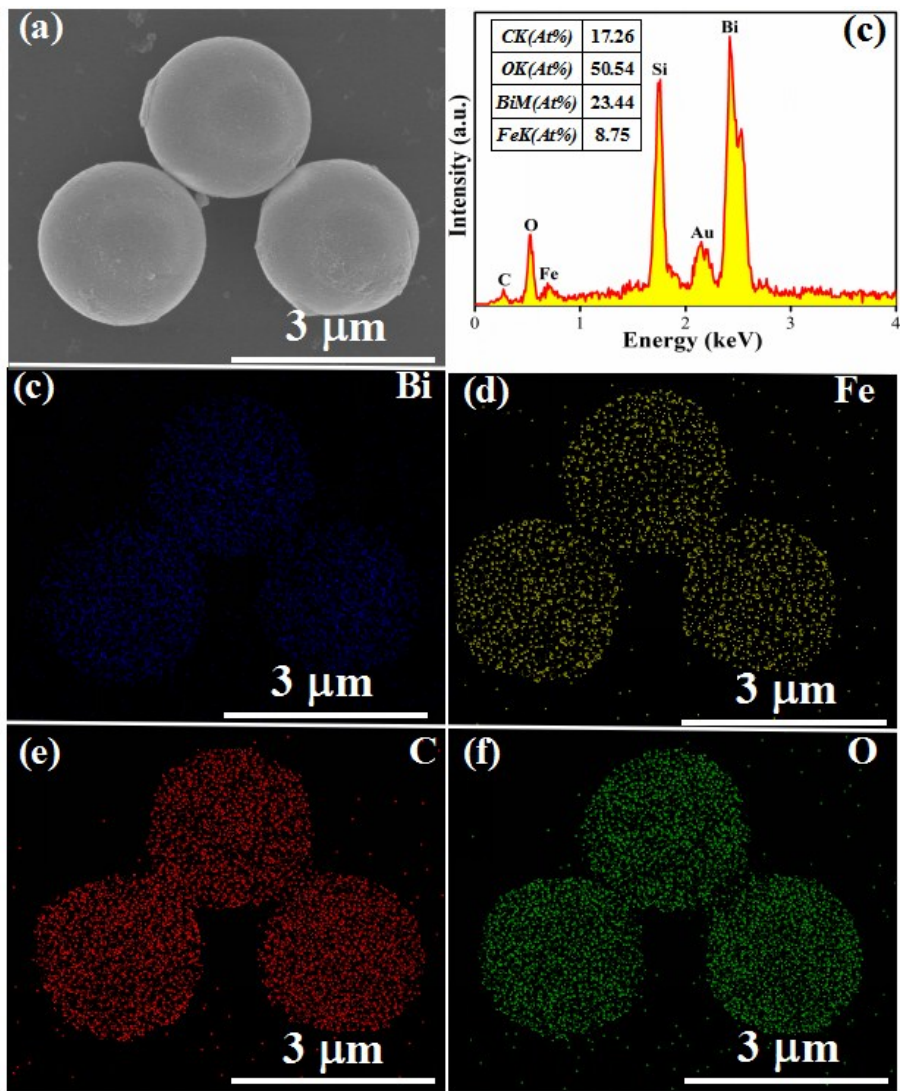

Fig. S3 EDS spectrum and elemental mapping of the BF5 sample.

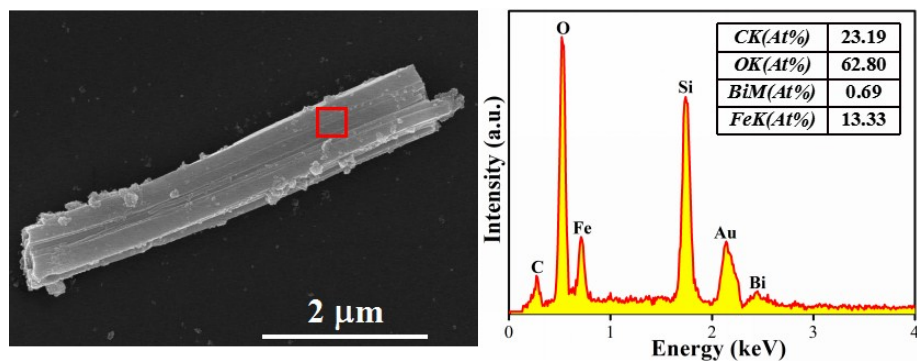

**Fig. S4** EDS spectrum of the microrod among as-prepared sample.

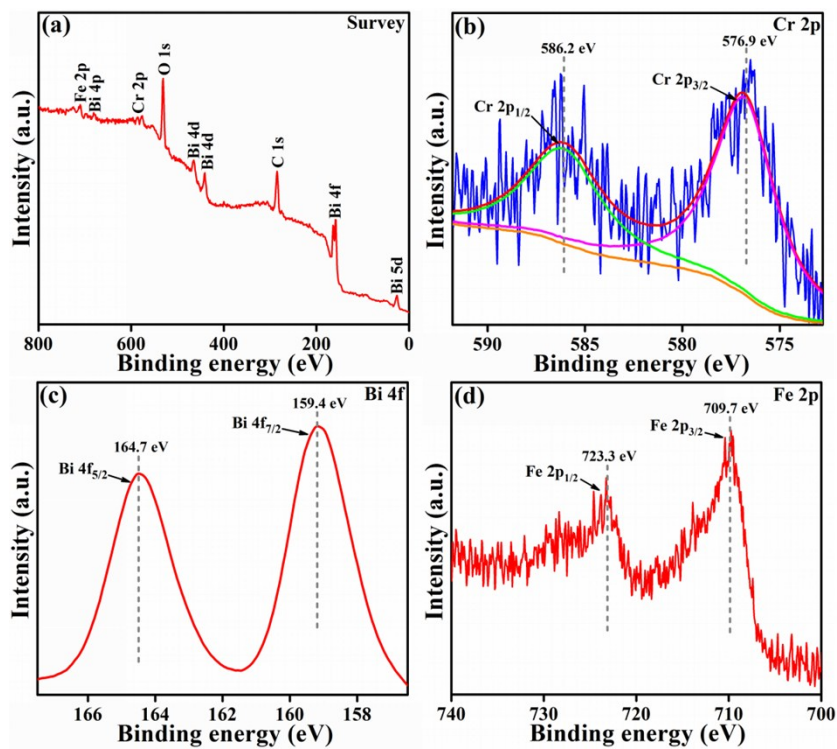

**Fig. S5** XPS spectra of the recycled BF5 sample: (a) XPS survey spectrum, (b) Cr<sub>2p</sub> spectrum, (c) Bi<sub>4f</sub> spectrum, and (d) Fe<sub>2p</sub> spectrum.

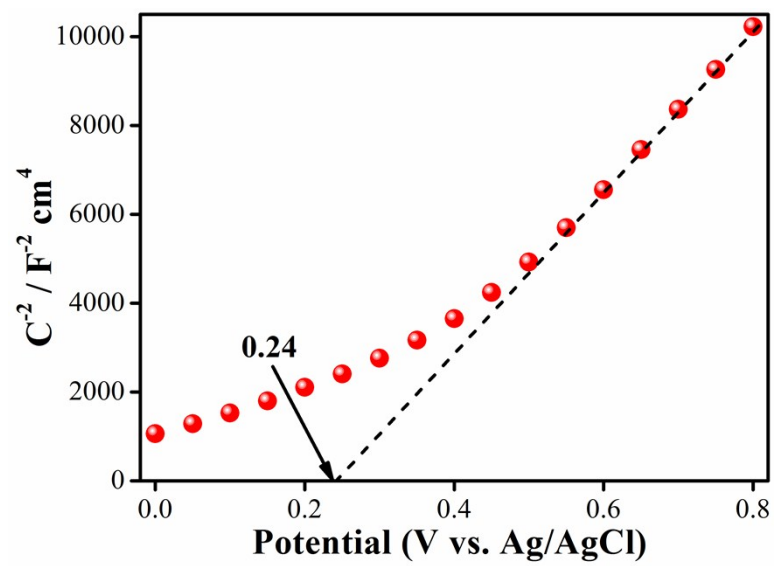

**Fig. S6** Mott-Schottky plot of  $\alpha$ -FOD.

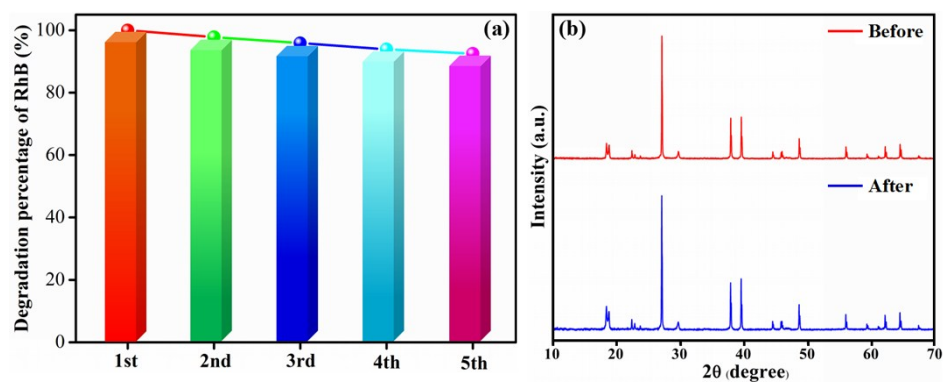

**Fig. S7** (a) The recycled Fenton oxidation experiments of the BF5 sample for the degradation of RhB; (b) The XRD patterns of BF5 sample before and after the 5th run cycle Fenton oxidation experiments.



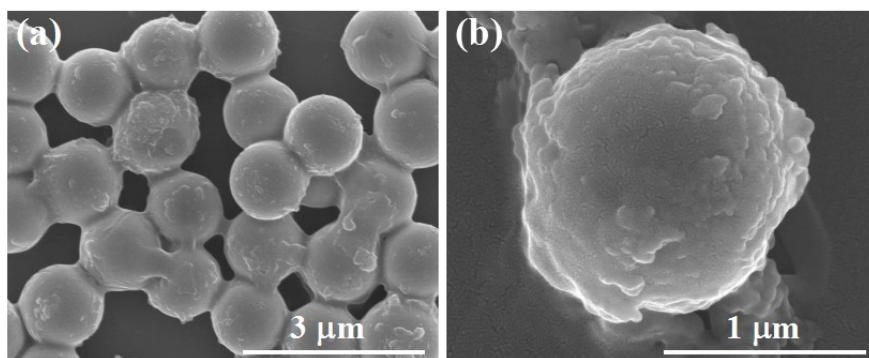

**Fig. S8** SEM images of recycled BF5 sample after the 5th run cycle Fenton oxidation experiments.
